# Supplementary material for: Continuous fluorometric method for measuring β-glucuronidase activity: comparative analysis of three fluorogenic substrates
Source: Royal Society of Chemistry journal article supplement (doi:10.1039/c5an01021g), 2015-01-01
Supplement: c5an01021g1.pdf [file c5an01021g1.pdf]

Supplemental Information for

## Continuous fluorometric method for measuring $\beta$ -Glucuronidase activity: comparative analysis of three fluorogenic substrates

Ciprian Briciu-Burghina,<sup>a</sup> Brendan Heery<sup>a</sup> and Fiona Regan<sup>\*a</sup>

<sup>a</sup> Marine and Environmental Sensing Technology Hub (MESTECH), National Centre for Sensor Research (NCSR), School of Chemical Sciences, Dublin City University, Dublin, Ireland;

\*Corresponding author e-mail: [fiona.regan@dcu.ie](mailto:fiona.regan@dcu.ie)

### Procedure used for the determination of Michealis-Menten kinetic parameters.

Table S-1 Buffer systems used for pH studies.

| Buffer System                                         | pH Values ( $\pm 0.01$ )                    |
|-------------------------------------------------------|---------------------------------------------|
| Sodium Citrate/- Citric Acid                          | 3.0, 3.6, 4.0, 4.6, 5.0                     |
| Sodium Phosphate Monobasic/- Sodium Phosphate Dibasic | 6.0, 6.2, 6.4, 6.6, 6.8, 7.0, 7.2, 7.4, 8.0 |
| Sodium Carbonate - Sodium Bicarbonate                 | 9.2, 10.0, 10.6, 11.4                       |

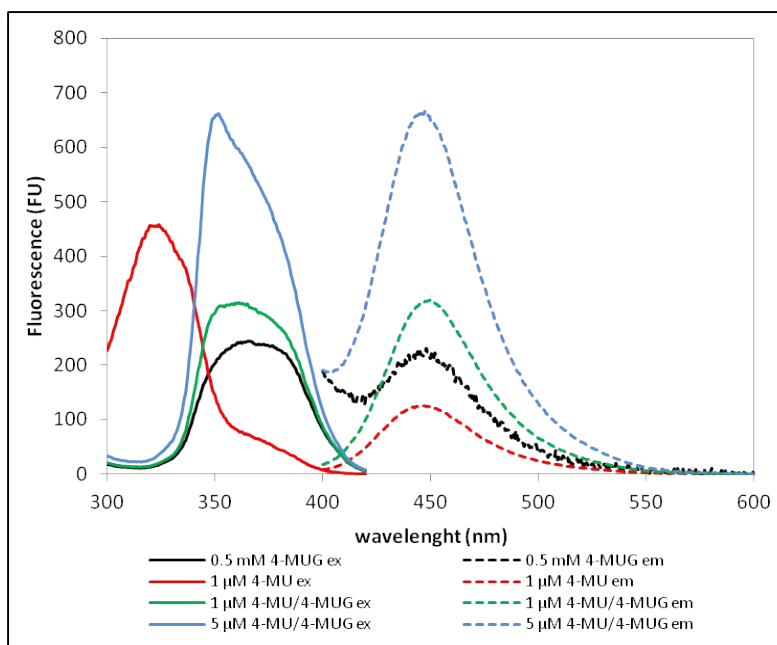

**Figure S-1** Excitation and emission spectra of 4-MUG and 4-MU; 4-MU em and 4-MU ex are the spectra of 4-MU; 4-MU/4-MUG ex and 4-MU/4-MUG em are spectra of 4-MU in the presence 0.5 mM 4-MUG; concentrations of 4-MU used are shown in the legend; emission wavelength: 446 nm; excitation wavelength: 351 nm; slit width: 5 nm (ex) and 2.5 nm (em). Measurements carried out using the LSB 50 fluorometer.

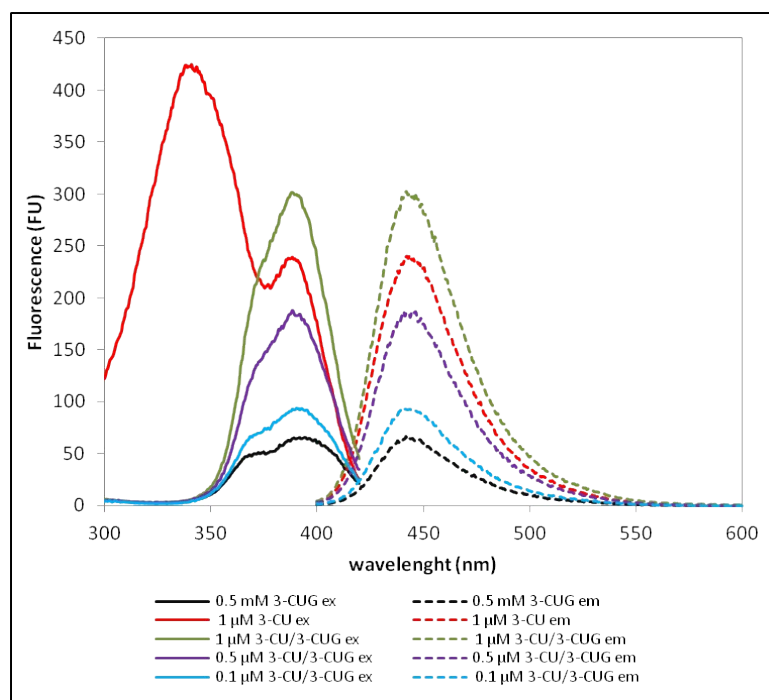

**Figure S-2** Excitation and emission spectra of 3-CUG and 3-CU; 3-CU em and 3-CU ex are the spectra of 3-CU; 3-CU /3-CUG ex and 3-CU /3-CUG em are spectra of 3-CU in the presence 0.5 mM 3-CUG; concentrations of 3-CU used are shown in the legend; emission wavelength : 446 nm; excitation wavelength: 351 nm; slit width: 5 nm (ex) and 2.5 nm (em). Measurements carried out using the LSB 50 fluorometer.

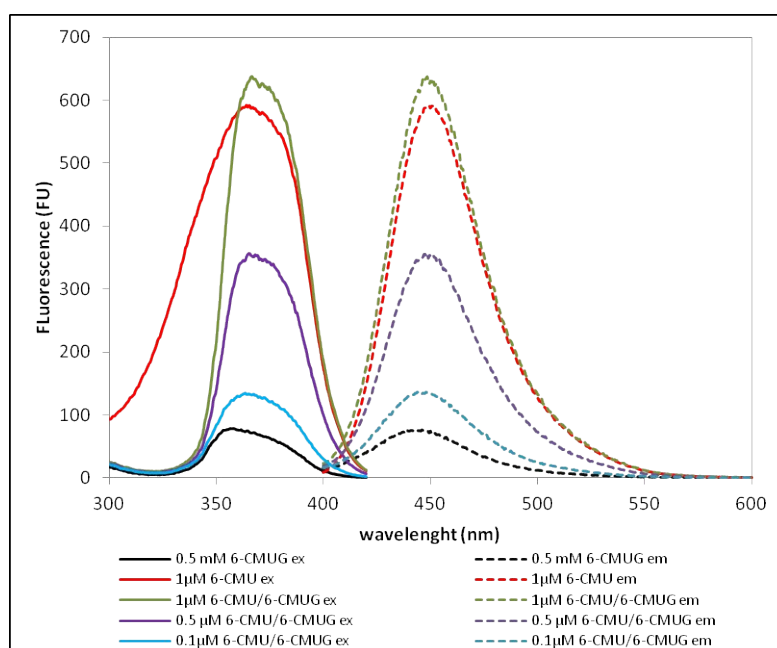

**Figure S-3** Excitation and emission spectra of 6-CMUG and 6-CMU; 6-CMU em and 6-CMU ex are the spectra of 6-CMU; 6-CMU/6-CMUG ex and 6-CMU/6-CMUG em are spectra of 6-CMU in the presence 0.5 mM 6-CMUG; concentrations of 6-CMU used are shown in the legend; emission wavelength: 446 nm; excitation wavelength: 351 nm; slit width: 5 nm (ex) and 2.5 nm (em). Measurements carried out using the LSB 50 fluorometer.

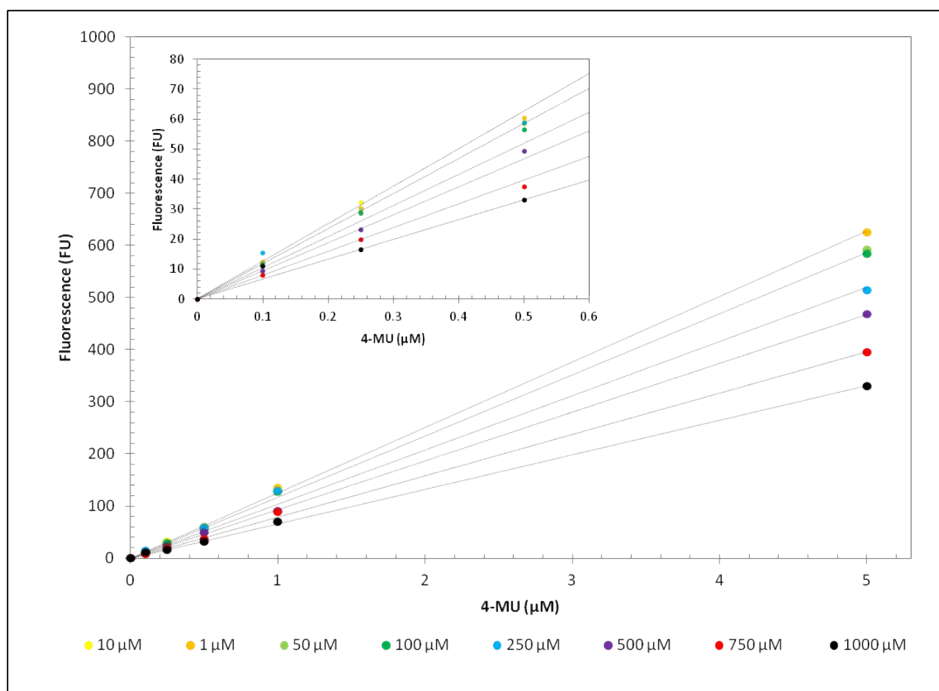

**Figure S-4** Calibration curves of 4-MU in the presence of different 4-MUG concentrations (shown in the legend);  $\lambda_{ex}$  = 351 nm,  $\lambda_{em}$  446 nm; slit widths: 5 nm (ex), 2.5 nm (em); dotted lines represent the trendlines of the linear regression model. Measurements carried out using the LSB 50 fluorometer.

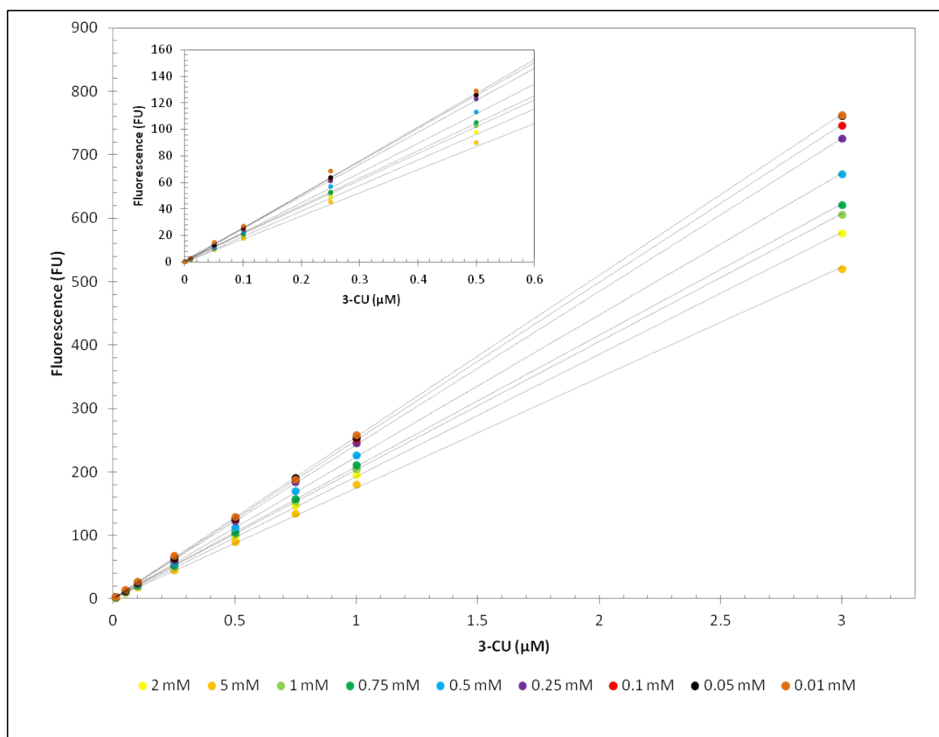

**Figure S-5** Calibration curves of 3-CU in the presence of different 3-CUG concentrations (shown in the legend);  $\lambda_{ex}$  = 389 nm,  $\lambda_{em}$  444 nm; slit widths: 5 nm (ex), 2.5 nm (em); the dotted lines represent the trendlines of the model. Measurements carried out using the LSB 50 fluorometer.

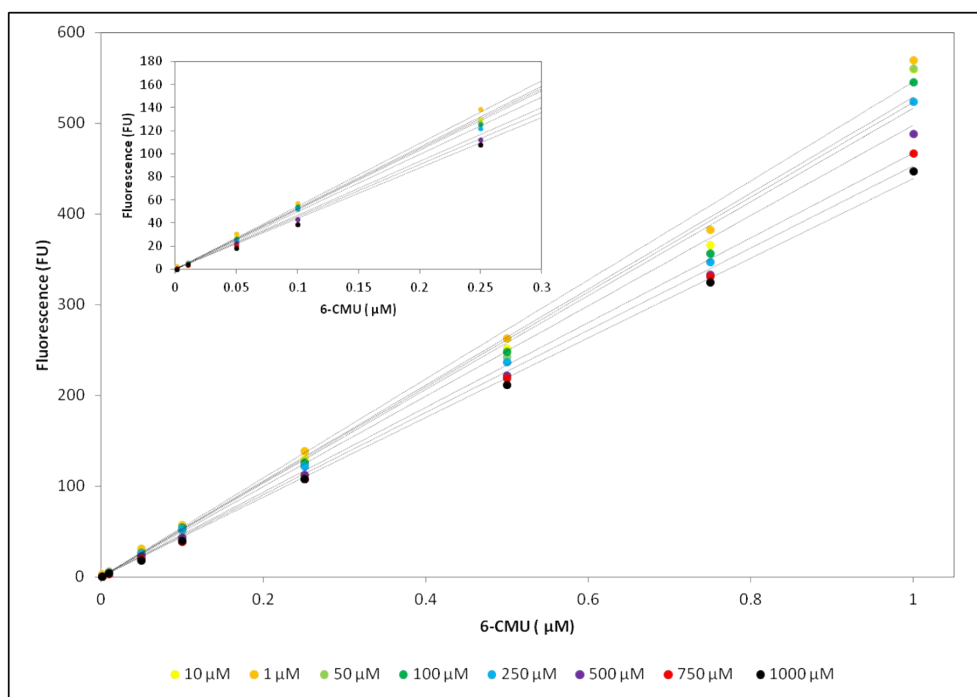

**Figure S-6** Calibration curves of 6-CMU in the presence of different 6-CMUG concentrations (shown in the legend);  $\lambda_{ex}$  = 365 nm,  $\lambda_{em}$  449 nm; slit widths: 5 nm (ex), 2.5 nm (em); the dotted lines represent the trendlines of the model. Measurements carried out using the LSB 50 fluorometer.

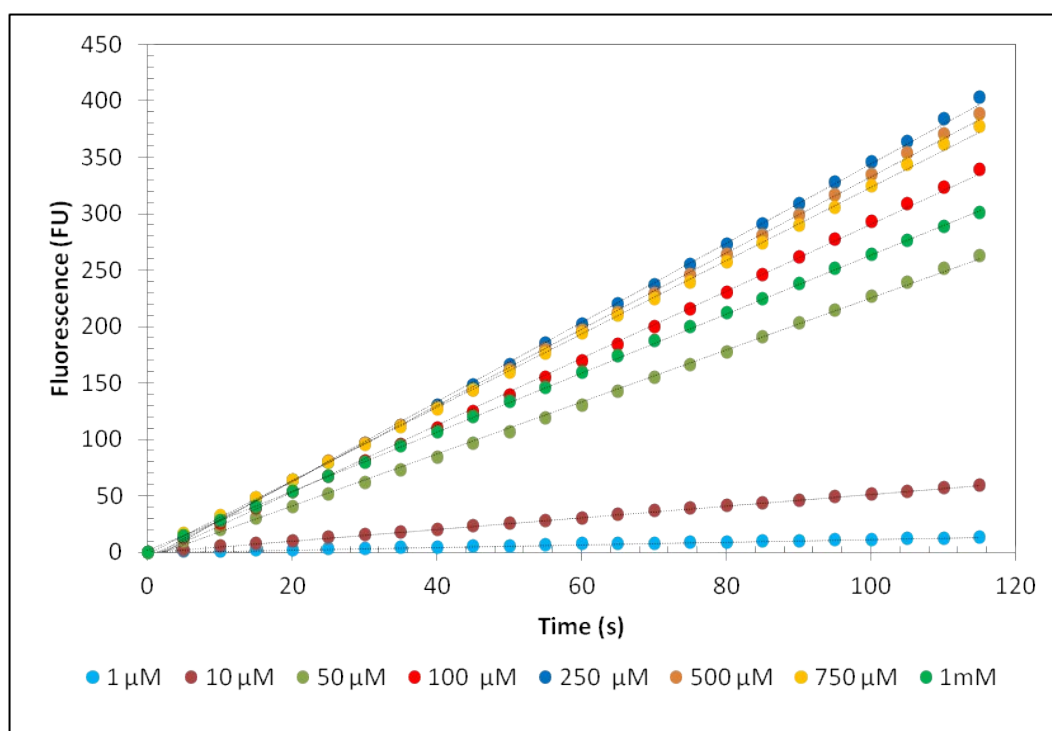

**Figure S-7** Progress curves for GUS catalysed hydrolysis of different 4-MUG concentrations (shown in the legend);  $\lambda_{ex}$  = 351 nm,  $\lambda_{em}$  446 nm; slit widths: 5 nm (ex), 2.5 nm (em); the dotted lines represent the trendlines of the model. GUS was added at a concentration of 135 ng mL<sup>-1</sup>. Measurements carried out using the LSB 50 fluorometer.

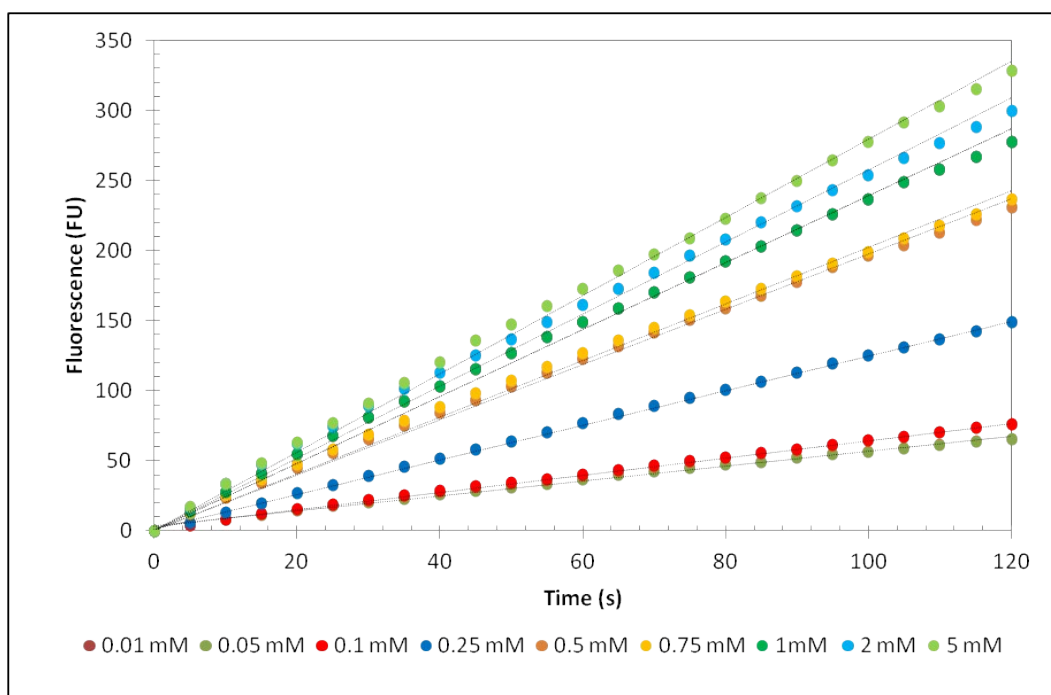

**Figure S-8** Progress curves for GUS catalysed hydrolysis of different 3-CUG concentrations (shown in the legend);  $\lambda_{ex}$  = 389 nm,  $\lambda_{em}$  444 nm; slit widths: 5 nm (ex), 2.5 nm (em); the dotted lines represent the trendlines of the model. GUS was added at a concentration of 135 ng mL<sup>-1</sup>. Measurements carried out using the LSB 50 fluorometer.

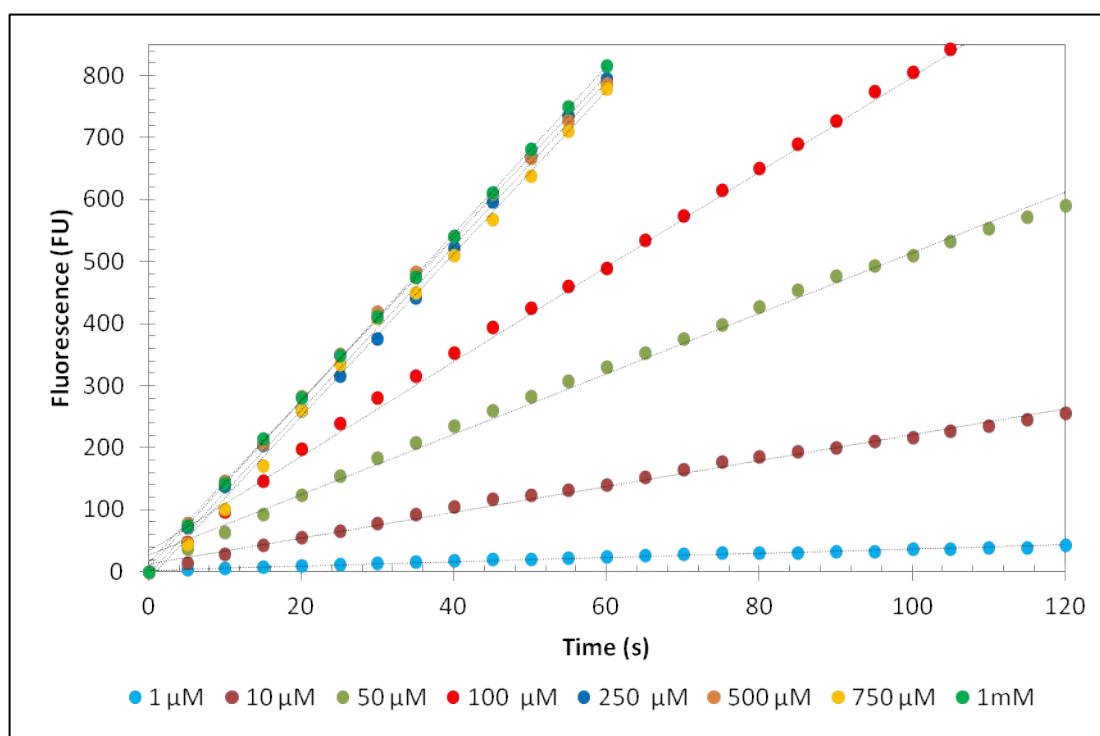

**Figure S-9** Progress curves for GUS catalysed hydrolysis of different 6-CMUG concentrations (shown in the legend);  $\lambda_{ex}$  = 365 nm,  $\lambda_{em}$  449 nm; slit widths: 5 nm (ex), 2.5 nm (em); the dotted lines represent the trendlines of the model. GUS was added at a concentration of 135 ng mL<sup>-1</sup>. Measurements carried out using the LSB 50 fluorometer.

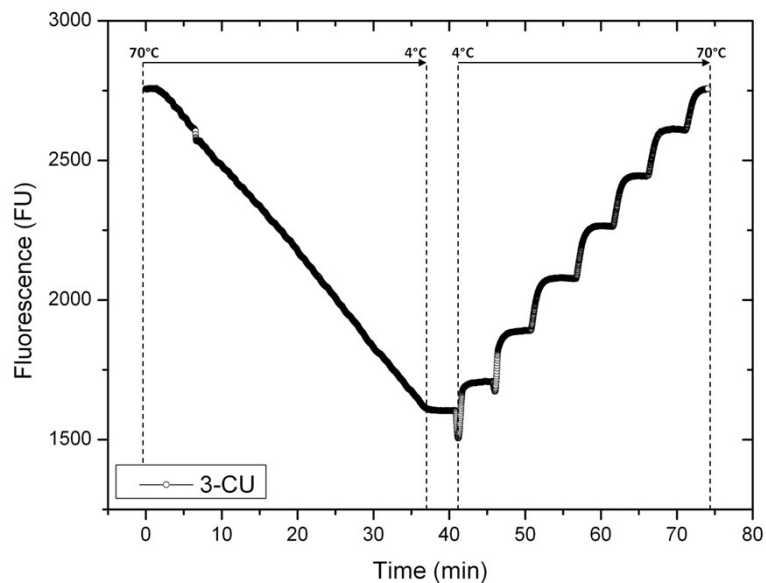

**Figure S-10** Temperature dependent fluorescence intensity of 3-CU at pH 6.8. Constant temperature decrease at a rate of  $2\text{ }^{\circ}\text{C min}^{-1}$  from  $70\text{ }^{\circ}\text{C}$  to  $4\text{ }^{\circ}\text{C}$  (left) and stepwise temperature increase from  $4\text{ }^{\circ}\text{C}$  to  $70\text{ }^{\circ}\text{C}$  with 5 min equilibrium steps (right); the first step used in this case was from  $4\text{ }^{\circ}\text{C}$  to  $10\text{ }^{\circ}\text{C}$  after which all the subsequent steps were  $10\text{ }^{\circ}\text{C}$  each;  $\lambda_{\text{ex}}=385\text{ nm}$ ,  $\lambda_{\text{em}}445\text{ nm}$ .

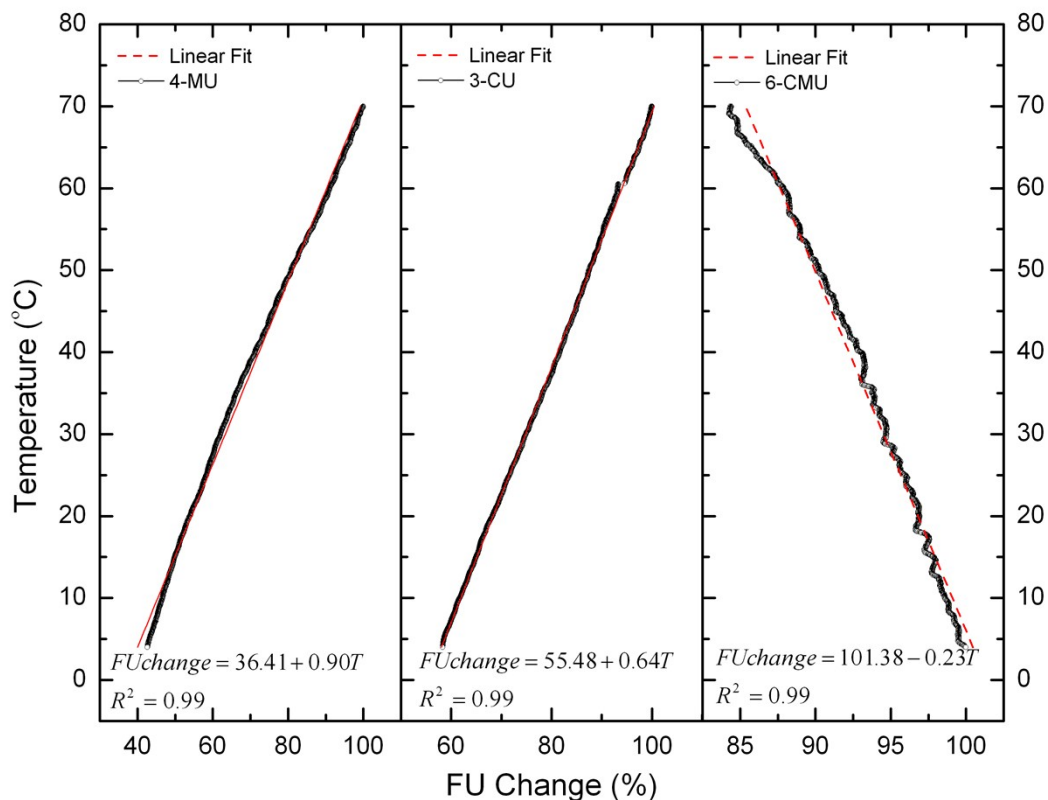

**Figure S-11** Temperature dependent fluorescence intensity of 4-MU, 3-CU and 6-CMU at pH 6.8. A constant temperature decrease rate of  $2\text{ }^{\circ}\text{C min}^{-1}$  from  $70\text{ }^{\circ}\text{C}$  to  $4\text{ }^{\circ}\text{C}$  was used to collect the data (example shown in Fig S-10). Equations corresponding to the linear fitting of the data are shown in each panel;  $\lambda_{\text{ex}} / \lambda_{\text{em}}$  used were:  $364 / 447$  (4-MU),  $385 / 445$  (3-CU),  $369 / 452$  (6-CMU).

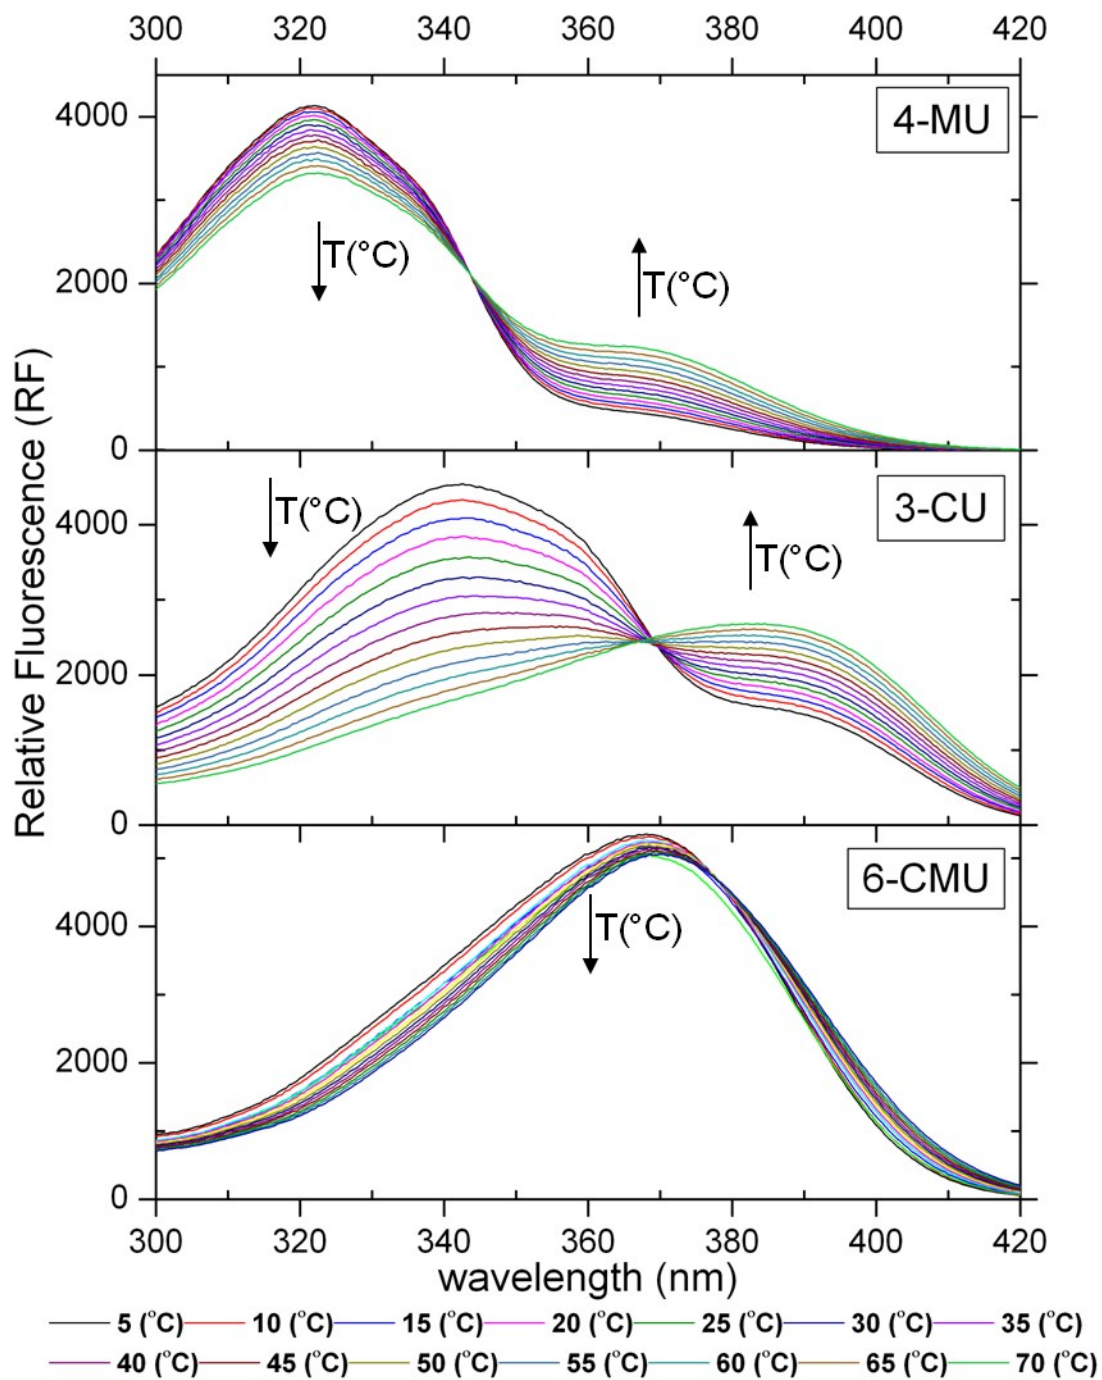

**Figure S-12** Temperature dependent excitation spectra of 4-MU, 3-CU and 6-CMU at pH 6.8;  $\lambda_{em}$  used were: 447 (4-MU), 445 (3-CU), 452 (6-CMU).
